# Supplementary material
Source: ML conference proceedings conference paper supplement (https://proceedings.mlr.press/v89/viswanathan19a.html)
Supplement: Supplementary file 1 [file viswanathan19a-supp.pdf]

---

# Improved Semi-Supervised Learning with Multiple Graphs: Supplementary Material

---

Krishnamurthy Viswanathan<sup>1</sup>  
Google Research

Sushant Sachdeva<sup>1</sup>  
University of Toronto

Sujith Ravi    Andrew Tomkins  
Google Research

## 1 Additional Proofs

**Lemma 1.1.** *We can express  $\Sigma_{\hat{y}_S}$  equivalently as follows,*

$$\Sigma_{\hat{y}_S} = I + \Pi_S \left( \sum_{i=1}^n \alpha_i L_{G_i} \right)^{-1} \Pi_S^\top$$

*Proof.* Let

$$L_w = \sum_{i=1}^n \alpha_i L_{G_i}$$

denote the weighted sum of Laplacians. Then

$$\begin{aligned} & \Sigma_{\hat{y}_S}^{-1} \left( I + \Pi_S L_w^{-1} \Pi_S^\top \right) \\ &= \left( I - \Pi_S (I_S + L_w)^{-1} \Pi_S^\top \right) \\ & \quad \left( I + \Pi_S L_w^{-1} \Pi_S^\top \right) \\ &= I - \Pi_S (I_S + L_w)^{-1} \Pi_S^\top \\ & \quad + \Pi_S L_w^{-1} \Pi_S^\top \\ & \quad - \Pi_S (I_S + L_w)^{-1} I_S L_w^{-1} \Pi_S^\top \\ &= I - \Pi_S (I_S + L_w)^{-1} \Pi_S^\top \\ & \quad + \Pi_S (I_S + L_w)^{-1} (I_S + L_w) L_w^{-1} \Pi_S^\top \\ & \quad - \Pi_S (I_S + L_w)^{-1} I_S L_w^{-1} \Pi_S^\top \\ &= I - \Pi_S (I_S + L_w)^{-1} \Pi_S^\top \\ & \quad + \Pi_S (I_S + L_w)^{-1} L_w L_w^{-1} \Pi_S^\top \\ &= I. \end{aligned}$$

□

**Lemma 1.2.** *Let  $B$  and  $W$  denote the edge-vertex incidence matrix, and the diagonal weight matrix of  $\sum_i \alpha_i L_{G_i}$ . Let  $M$  be the matrix  $\left[ I, \Pi_S \left( \sum_i \alpha_i L_{G_i} \right)^{-1} B W^{\frac{1}{2}} \right]$ . Then  $MM^\top = \Sigma_{\hat{y}_S}$ , and thus,*

$$\begin{aligned} & \text{Tr}(\Sigma_{\hat{y}_S} \Pi_S L^{-1} L_{G_i} L^{-1} \Pi_S^\top) \\ &= \text{Tr}((L^{-1} \Pi_S^\top M)^\top L_{G_i} (L^{-1} \Pi_S^\top M)) \end{aligned}$$

---

<sup>1</sup>Equal contribution

*Proof.* We have  $BWB^\top = \sum_i \alpha_i L_{G_i}$ . Thus,

$$\begin{aligned} MM^\top &= I + \Pi_S \left( \sum_i \alpha_i L_{G_i} \right)^{-1} B W B^\top \left( \sum_i \alpha_i L_{G_i}^{-1} \Pi_S^\top \right) \\ &= I + \Pi_S \left( \sum_i \alpha_i L_{G_i} \right)^{-1} \Pi_S^\top = \Sigma_{\hat{y}_S}. \end{aligned}$$

The claim about  $\text{Tr}(\cdot)$  follows due to the cyclic property of the trace operator. □
